# Supplementary material for: X Chromosome Crossover Formation and Genome Stability inCaenorhabditis elegansAre Independently Regulated byxnd-1
Source: Oxford University Press journal article supplement (doi:10.1534/g3.116.035725), 2016-10-07
Supplement: 035725_figures1.pdf [file 035725_figures1.pdf]

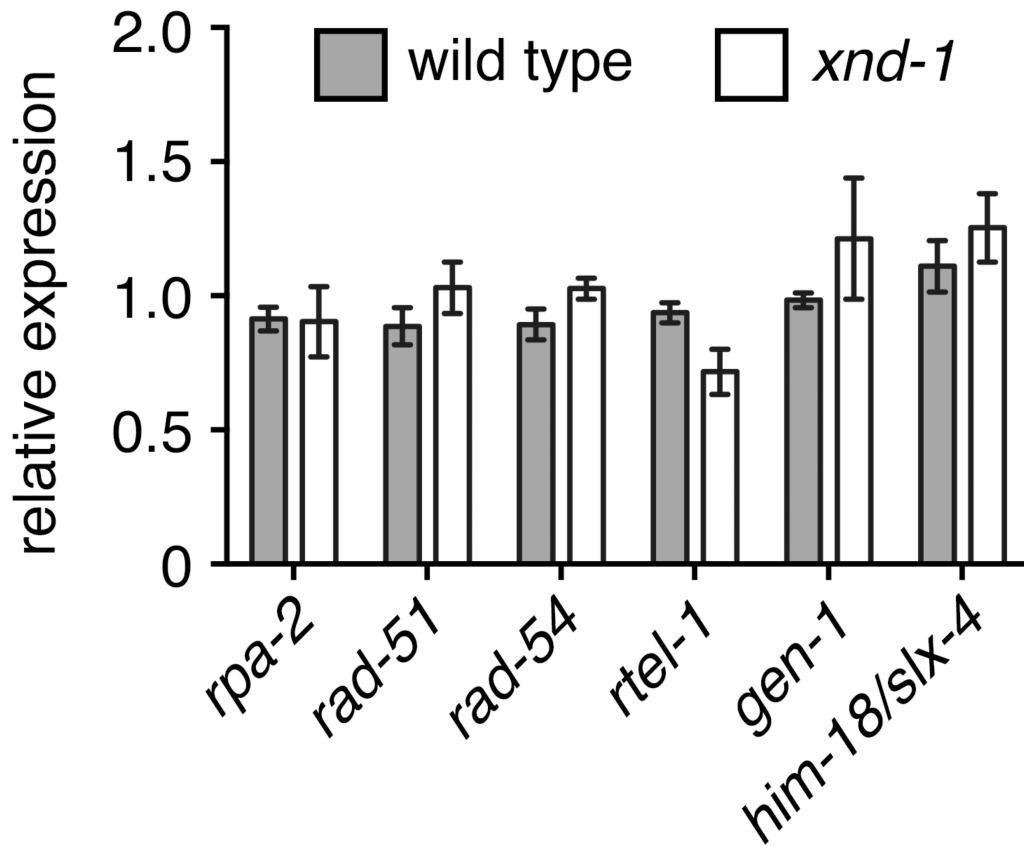

**Figure S1. Quantitative PCR of select DNA repair genes.**

Expression of select DSB repair genes from Supplemental Table 3 using cDNA from day 1 adult N2 or *xnd-1* hermaphrodites. Results are presented as average expression relative to reference genes from three biological replicates that in turn are comprised of three technical replicates  $\pm$  SEM.
