# Supplementary material for: X Chromosome Crossover Formation and Genome Stability inCaenorhabditis elegansAre Independently Regulated byxnd-1
Source: Oxford University Press journal article supplement (doi:10.1534/g3.116.035725), 2016-10-07
Supplement: 035725_figures2.pdf [file 035725_figures2.pdf]

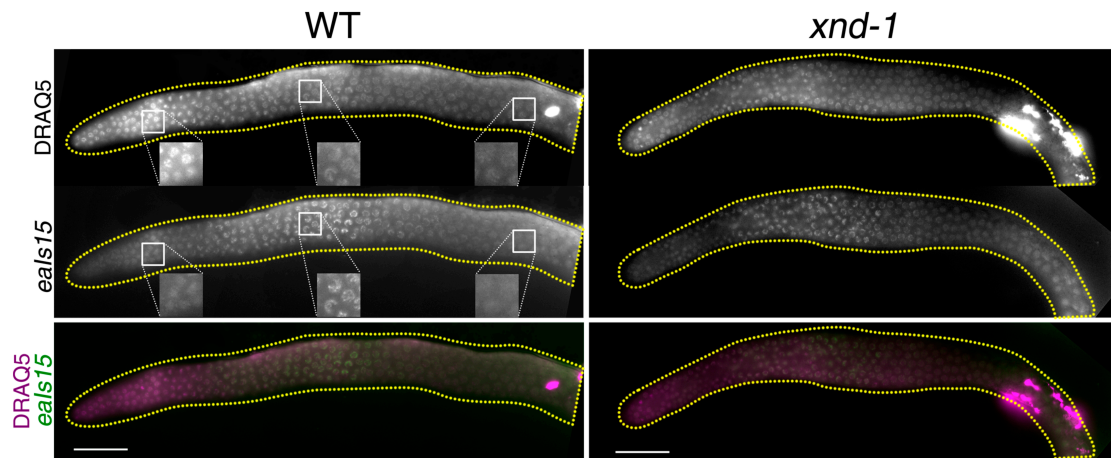

**Figure S2. *eaIs15* transgene expression.**

Expression of *eaIs15* (green) together with the DNA dye, DRAQ5 (magenta), reveals diffuse nuclear localization in mitotic nuclei, chromatin association in transition zone through mid-pachytene, and diffuse localization in late-pachytene (see insets). Scale bar = 20  $\mu$ m.
