# Supplementary material for: X Chromosome Crossover Formation and Genome Stability inCaenorhabditis elegansAre Independently Regulated byxnd-1
Source: Oxford University Press journal article supplement (doi:10.1534/g3.116.035725), 2016-10-07
Supplement: 035725_tables1.pdf [file 035725_tables1.pdf]

**Table S1. Strains generated for this study.**

| STRAIN | GENOTYPE                                                                                                                      | REFERENCE IN TEXT      |
|--------|-------------------------------------------------------------------------------------------------------------------------------|------------------------|
| QP654  | <i>cep-1(gk138) I;xnd-1(ok709) III/hT2 [bli-4(3937) let-?(q782) qls48]</i>                                                    | <i>xnd-1;cep-1(gk)</i> |
| QP663  | <i>unc-119(ed3) III;eals4[P<sub>him-5</sub>::him-5::gfp::3xFLAG + unc-119(+)] ?</i>                                           | <i>unc-119;eals4</i>   |
| QP810  | <i>xnd-1(ok709) III/qC1 [dpy-19(e1259) glp-1(q339) qls26] III;mys-1(n3681) V</i>                                              | <i>xnd-1;mys-1</i>     |
| QP953  | <i>atm-1(gk186) I;xnd-1(ok709) III/hT2 [bli-4(3937) let-?(q782) qls48] (I;III)</i>                                            | <i>xnd-1;atm-1</i>     |
| QP964  | <i>eals15[P<sub>pie-1</sub>::him-5::gfp + unc-119(+)] III];him-5(ok1896) V</i>                                                | <i>him-5;eals15</i>    |
| QP1016 | <i>xnd-1(ok709) III, eals15[P<sub>pie-1</sub>::him-5::gfp + unc-119(+)] III]/qC1 [dpy-19(e1259) glp-1(q339) qls26] III</i>    | <i>xnd-1,eals15</i>    |
| QP1030 | <i>eals15[P<sub>pie-1</sub>::him-5::gfp::pie-1 3' UTR + unc-119(+)]/qC1 [dpy-19(e1259) glp-1(q339) qls26] III</i>             | <i>eals15</i>          |
| QP1042 | <i>xnd-1(ok709) III/qC1 [dpy-19(e1259) glp-1(q339) qls26] III</i>                                                             | <i>xnd-1 (qC1)</i>     |
| QP1089 | <i>xnd-1(ok709) III/qC1 [dpy-19(e1259) glp-1(q339) qls26] III;ced-3(n717) IV</i>                                              | <i>xnd-1;ced-3</i>     |
| QP1173 | <i>qC1 [dpy-19(e1259) glp-1(q339) qls26] III;eals4[P<sub>him-5</sub>::him-5::gfp::3xFLAG + unc-119(+)] ?</i>                  | <i>eals4</i>           |
| QP1174 | <i>xnd-1(ok709) III/qC1 [dpy-19(e1259) glp-1(q339) qls26] III;eals4[P<sub>him-5</sub>::him-5::gfp::3xFLAG + unc-119(+)] ?</i> | <i>xnd-1;eals4</i>     |
| QP1175 | <i>qC1 [dpy-19(e1259) glp-1(q339) qls26] III;mys-</i>                                                                         | <i>mys-1;eals4</i>     |

|        |                                                                                                                                              |                          |
|--------|----------------------------------------------------------------------------------------------------------------------------------------------|--------------------------|
|        | <i>1(n3681) V;eals4[P<sub>him-5</sub>::him-5::gfp::3xFLAG + unc-119(+)] ?</i>                                                                |                          |
| QP1176 | <i>xnd-1(ok709) III/qC1 [dpy-19(e1259) glp-1(q339) qls26] III;mys-1(n3681) V;eals4[P<sub>him-5</sub>::him-5::gfp::3xFLAG + unc-119(+)] ?</i> | <i>xnd-1;mys-1;eals4</i> |
| QP1180 | <i>hus-1(op244) I;xnd-1(ok709) III/hT2 [bli-4(3937) let-?(q782) qls48] (I;III)</i>                                                           | <i>xnd-1;hus-1</i>       |
| QP1181 | <i>cep-1(lg12501) I;xnd-1(ok709) III/hT2 [bli-4(3937) let-?(q782) qls48]</i>                                                                 | <i>xnd-1;cep-1(lg)</i>   |
| QP1182 | <i>atm-1(gk186) I/hT2 [bli-4(3937) let-?(q782) qls48] (I;III);mys-1(n3681) V</i>                                                             | <i>atm-1;mys-1</i>       |
| QP1183 | <i>atm-1(gk186) I;xnd-1(ok709) III/hT2 [bli-4(3937) let-?(q782) qls48] (I;III);mys-1(n3681) V</i>                                            | <i>xnd-1;atm-1;mys-1</i> |
