# Supplementary material for: X Chromosome Crossover Formation and Genome Stability inCaenorhabditis elegansAre Independently Regulated byxnd-1
Source: Oxford University Press journal article supplement (doi:10.1534/g3.116.035725), 2016-10-07
Supplement: 035725_tables2.pdf [file 035725_tables2.pdf]

**Table S2. qPCR primers**

| PRIMER     | GENE                    | SEQUENCE (5'→3')        |
|------------|-------------------------|-------------------------|
| JY-TBM-166 | Y45F10D.4 (F)           | TTCACTGTTCAATGCTCGC     |
| JY-TBM-167 | Y45F10D.4 (R)           | CTTAGGCCTTCTTAGTCTGCT   |
| JY-TBM-168 | <i>rpl-32</i> (F)       | GGATTTGGACATGCTCCTC     |
| JY-TBM-169 | <i>rpl-32</i> (R)       | GATTCCTTGCGGCTCTT       |
| JY-TBM-207 | <i>him-5</i> (F)        | CTTTCTATGCAAAGCTCCGG    |
| JY-TBM-208 | <i>him-5</i> (R)        | TCGTCATTGGAGTCGACAG     |
| JY-TBM-217 | <i>gen-1</i> (F)        | GGAAGCTTCGTTTACGACG     |
| JY-TBM-218 | <i>gen-1</i> (R)        | TCGTAATTGCATTGTGTACGG   |
| JY-TBM-229 | <i>rad-54</i> (F)       | GAAGATAAGGATCGAAAGGTGC  |
| JY-TBM-230 | <i>rad-54</i> (R)       | AACACCATCTCTTTGATGCG    |
| JY-TBM-235 | <i>rpa-2</i> (F)        | AGAAAGCCTGACTCGAAGG     |
| JY-TBM-236 | <i>rpa-2</i> (R)        | AAAGTGCTCGATCAGATTGGA   |
| JY-TBM-237 | <i>rtel-1</i> (F)       | GATTTCTCGGAGTGACACTG    |
| JY-TBM-238 | <i>rtel-1</i> (R)       | TGTATTCCGGTCTTCGAATTCTC |
| JY-TBM-241 | <i>slx-4/him-18</i> (F) | TCAGCTTCCAGTACCAGTG     |
| JY-TBM-242 | <i>slx-4/him-18</i> (R) | CATTTCTTCCAAGGATACAGGT  |
| JY-TBM-251 | <i>rad-51</i> (F)       | GTATCACTGAGGTTTACGGAG   |
| JY-TBM-252 | <i>rad-51</i> (R)       | TCGGCAATTGACACAAGAC     |
| 141GFP-For | <i>gfp</i> (F)          | CAACCATTACCTGTCCACAC    |
| 140GFP-Rev | <i>gfp</i> (R)          | CCCAGCAGCTGTTACAAACTC   |
