# Supplementary material for: X Chromosome Crossover Formation and Genome Stability inCaenorhabditis elegansAre Independently Regulated byxnd-1
Source: Oxford University Press journal article supplement (doi:10.1534/g3.116.035725), 2016-10-07
Supplement: 035725_tables3.pdf [file 035725_tables3.pdf]

**Table S3. Fold change of HR gene transcripts in *xnd-1* germ lines vs. N2 from microarray analysis.**

| GENE ID   | GENE                | FOLD-CHANGE VS. N2 | P VALUE     |
|-----------|---------------------|--------------------|-------------|
| C36A4.8   | <i>brc-1</i>        | -1.36              | 0.00337246  |
| T07E3.5   | <i>brc-2</i>        | -1.44              | 0.0164627   |
| C44B9.5   | <i>com-1</i>        | -1.31              | 0.0253062   |
| F43G6.1   | <i>dna-2</i>        | -1.20              | 0.23002     |
| F45G2.3   | <i>exo-1</i>        | -1.66              | 0.172709    |
| T12A2.8   | <i>gen-1</i>        | -2.61              | 0.0268457   |
| Y55B1AL.3 | <i>helq-1</i>       | -1.43              | 0.0793733   |
| T04A11.6  | <i>him-6</i>        | 1.06               | 0.832171    |
| ZC302.1   | <i>mre-11</i>       | 1.03               | 0.836952    |
| C43E11.2  | <i>mus-81</i>       | -1.40              | 0.00451027  |
| T04H1.4   | <i>rad-50</i>       | -1.35              | 0.0134553   |
| Y43C5A.6  | <i>rad-51</i>       | -1.10              | 0.428344    |
| W06D4.6   | <i>rad-54</i>       | -1.89              | 0.00290133  |
| C30A5.2   | <i>rfs-1</i>        | -1.41              | 0.00909496  |
| F18A1.5   | <i>rpa-1</i>        | -1.54              | 0.0762194   |
| M04F3.1   | <i>rpa-2</i>        | -2.21              | 0.016903    |
| F59A3.5   | <i>rpa-3</i>        | -1.29              | 0.123258    |
| F25H2.13  | <i>rtel-1</i>       | -1.90              | 0.00602302  |
| F56A3.2   | <i>slx-1</i>        | -1.88              | 0.00210819  |
| T04A8.15  | <i>slx-4/him-18</i> | -2.65              | 0.000529513 |
| Y56A3A.27 | <i>top-3</i>        | 1.55               | 0.150057    |
| C47D12.8  | <i>xpf-1</i>        | -1.79              | 0.147465    |
