# Supplementary material for: X Chromosome Crossover Formation and Genome Stability inCaenorhabditis elegansAre Independently Regulated byxnd-1
Source: Oxford University Press journal article supplement (doi:10.1534/g3.116.035725), 2016-10-07
Supplement: 035725_tables4.pdf [file 035725_tables4.pdf]

**Table S4. *eals4* rescues the Him phenotype of *him-5*.**

| GENOTYPE           | N    | # MALE | % MALE |
|--------------------|------|--------|--------|
| <i>him-5</i>       | 1640 | 590    | 36     |
| <i>him-5;eals4</i> | 350  | 0      | 0      |
